# Supplementary material
Source: HighWire-hosted journal article supplement (https://learnmem.cshlp.org/content/suppl/2024/04/30/31.4.a053993)
Supplement: Supplemental_Material.docx [file Supplemental_Material.docx]

**Title:** Remembering what we imagine: The role of event schemas in shaping how imagined autobiographical events are recalled

Can Fenerci1, Bianca Adjei1, Signy Sheldon1
**Affiliations**: Department of Psychology, McGill University1

**SUPPLEMENTAL MATERIALS**

Contents

Supplemental Table 1.

Supplemental Figure 1.

Task Instructions

Supplemental Table 2.

**Supplemental Table 1.**

List of 24 indoor context cues used in the experiment and the mean frequency and recency rating by the participants.

| ­­­Indoor Context | Frequency | Recency |
| --- | --- | --- |
| Airport | 3.00 | 3.56 |
| Arcade | 1.24 | 1.52 |
| Bakery | 2.00 | 3.00 |
| Bar | 4.64 | 4.09 |
| Church | 2.18 | 2.68 |
| Classroom | 5.00 | 4.42 |
| Clothing Store | 4.75 | 4.67 |
| Coffee Shop | 4.73 | 4.55 |
| Concert Hall | 1.57 | 2.64 |
| Courtroom | 1.00 | 1.19 |
| Dining Room | 5.00 | 5.00 |
| Doctor's Office | 2.41 | 3.47 |
| Grocery Store | 5.00 | 5.00 |
| Gym | 4.27 | 4.00 |
| Hair Salon | 1.79 | 2.57 |
| Hotel Lobby | 2.09 | 3.09 |
| Kitchen | 4.83 | 4.83 |
| Laundromat | 1.30 | 1.65 |
| Library | 4.44 | 4.44 |
| Living Room | 5.00 | 5.00 |
| Movie Theater** | *NA* | *NA* |
| Museum | 2.00 | 3.55 |
| Restaurant | 5.00 | 4.73 |
| Subway | 4.74 | 4.68 |

Note: **Movie Theater was used as an example as part of the task instructions and was not presented as a cue to the participants during the experiment. All ratings were out of 5.


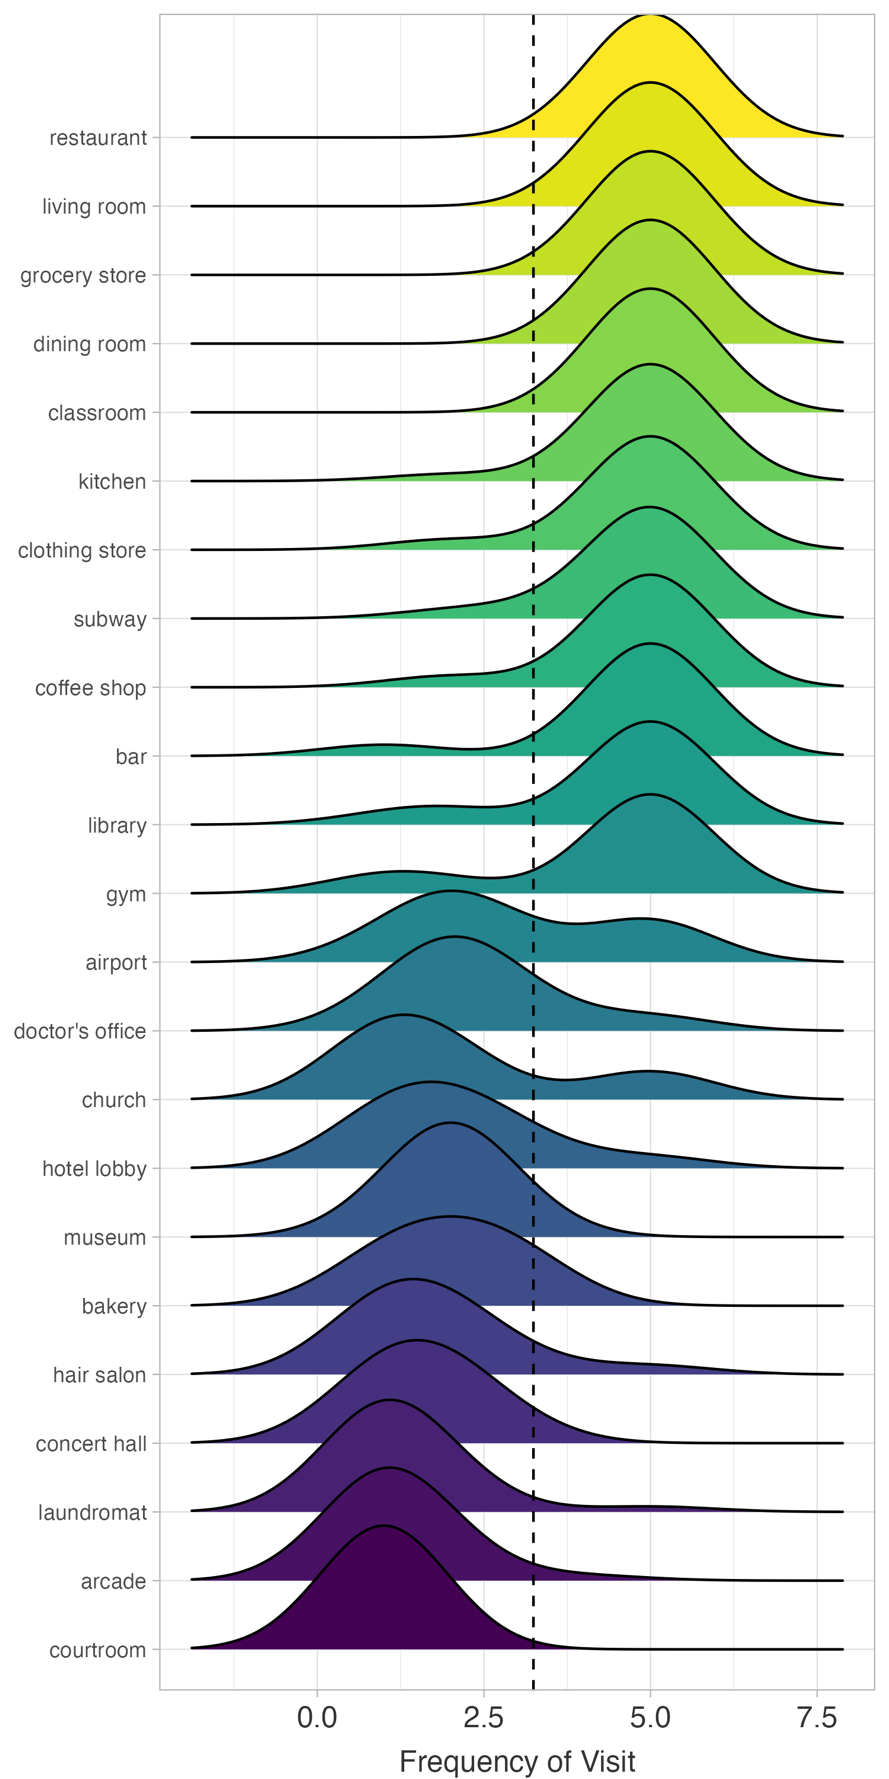


*Supplemental Figure**1.*Distribution of frequency ratings made by participants for each location, which was used to select 6 most and 6 least frequently visited locations as cues for each participant.

**Task Instructions**

In the first part of the experiment, you were asked to come up with and describe events that occurred in the given locations. Here, you will see the names of the locations from the first experiment again and remember the events you described in as much detail as possible. First you will be given the name of the location and next you will remember the name of the event you described in response to this location cue. Then, you will remember all the details from the event you came up with yesterday. Finally, you will describe all the details you can from this event again.

**Supplemental Table 2.**

Intra-class correlations (ICC) and associated Cronbach’s alpha values assessing inter-rater reliability between the two trained scorers, which was established on 12 randomly selected descriptions.

| Measures | ICC | Cronbach’s alpha |
| --- | --- | --- |
| Hits | 0.91 | 0.95 |
| Additions | 0.88 | 0.93 |
| Internal Hits | 0.96 | 0.98 |
| External Hits | 0.81 | 0.82 |
| Internal Additions | 0.88 | 0.94 |
| External Additions | 0.94 | 0.97 |

Note: ICC values were calculated using the two-way mixed effects model, which treats the raters as fixed effects given that the selected raters are the only raters of interest.
